# Supplementary material for: Application of Prognostic Model based on Histone Phosphorylation Modification Gene in Lung Adenocarcinoma
Source: Research Square preprint supplement (doi:10.21203/rs.3.rs-7953290/v1), 2025-11-26
Supplement: Supplementary file 1 [file 315ec56fc7aea93944e723fe.xlsx]

## Sheet: S1
42 genes related to histone phosphorylation were collected from published literature.
gene	PMID
ATM	32817543
ATR	29340707
AURKA	17640894
AURKB	16762841
AURKC	19843527
BAZ1B	19151707;31488827
BUB1	27183194;28768201
CARM1	20693977
CDK1	19878867
CDK2	15913612
CDK3	24728993
CDK5	15916946;24598821
CDK7	17694078
CHD4	35390161;10951572
CHEK1	26878753
DAPK3	19965387
GATAD2B	30765437;32240600
HASPIN	25690891;18243090
JAK2	20111005;26153137;26169266;24240475;22196736
MASTL	35780928;16982762
PBK	31983282;26153137;
PKM	26153137
PKN1	24063517;26153137;26169266;24240475;22196736
PPP4C	18285460
PRKDC	20705812;33130883
RUVBL1	11571274;16426422
SMC1A	15917996
SUV39H1	25609707
TAF1	32306542
TLK1	34893691
TRRAP	24793694
TTK	15143281
VRK1	33627431
TLK2	35136069
PRKAG1	31983282
CHD7	25533843;26153137;26169266
CIT	22334079;26153137;26169266
EYA4	19561593
NEK6	34643969
PRKAA2	33779513;26153137;24240475
PRKAG3	26153137
TSSK6	32337545
